# Supplementary material for: Evaluating the Reliability of Non-Specialist Observers in the Behavioural Assessment of Semi-Captive Asian Elephant Welfare
Source: PubMed Central journal article supplement (PMC7022305; doi:10.3390/ani10010167), 2020-01-18
Supplement: animals-10-00167-s001.pdf [file animals-10-00167-s001.pdf]

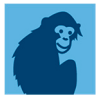

# Supplementary Materials: Evaluating the Reliability of Non-Specialist Observers in the Behavioural Assessment of Semi-Captive Asian Elephant Welfare

Jonathan L. Webb <sup>1,2,\*</sup>, Jennie A. H. Crawley <sup>3</sup>, Martin W. Seltmann <sup>3</sup>, Océane Liehrmann <sup>3,4</sup>, Nicola Hemmings <sup>1</sup>, U Kyaw Nyein <sup>5</sup>, Htoo Htoo Aung <sup>5</sup>, Win Htut <sup>5</sup>, Virpi Lummaa <sup>3</sup> and Mirkka Lahdenperä <sup>3</sup>

<sup>1</sup> Department of Animal and Plant Sciences, University of Sheffield, Sheffield S10 2TN, United Kingdom; jonathan.wb@outlook.com (J.L.W.); n.hemmings@sheffield.ac.uk (N.H.)

<sup>2</sup> School of Psychology, University of Auckland, 23 Symonds Street, Auckland 1010, New Zealand; jonathan.wb@outlook.com (J.L.W.)

<sup>3</sup> Department of Biology, University of Turku, 20500 Turku, Finland; jahcra@utu.fi (J.A.H.C.); martin.seltmann@utu.fi (M.W.S.); oceane.liehrmann@gmail.com (O.L.); virpi.lummaa@utu.fi (V.L.); mirkka.lahdenpera@utu.fi (M.L.)

<sup>4</sup> UFR des Sciences, University of Caen, 14000 Caen, France; oceane.liehrmann@gmail.com (O.L.)

<sup>5</sup> Myanma Timber Enterprise, Gyogone Forest Compound, Bayint Naung Road, Insein Township, Yangon 11011, Myanmar; kyaw.nyein.mte@gmail.com (U.K.N.); kohtooaung723@gmail.com (H.H.A.); winhtut641@gmail.com (W.H.)

\* Correspondence: jonathan.wb@outlook.com

Received: 29 November 2019; Accepted: 10 January 2020; Published: date

**Table S1.** Distributions used in repeatability modelling. General behaviours (Table 1A) above the dotted line and object-directed behaviours (Table 1B) below.

| Behaviour              | Datatype |
|------------------------|----------|
| Trunk swing            | Poisson  |
| Trunk curl             | Poisson  |
| Trunk curl-drop        | Poisson  |
| Trunk in mouth         | Binary   |
| Ear flap               | Poisson  |
| Tail flick             | Poisson  |
| Object pick up         | Binary   |
| Object in mouth        | Poisson  |
| Throw/flick            | Poisson  |
| Stand on/kick          | Poisson  |
| Object test with trunk | Poisson  |
| Object test with foot  | Binary   |
| Testing time           | Poisson  |
| Holding time           | Poisson  |

**Table S2.** The presence, average and total range per video of ethogram behaviours across the 651 total video observations carried out by the three observers used for inter-observer reliability and behaviour repeatability. The range stated is the lowest and highest number of behaviours per video recorded by any observer. General behaviours (Table 1A) above the dotted line and object-directed behaviours (Table 1B) below.

| Behaviour              | Presence (%) | Average per video | Range  |
|------------------------|--------------|-------------------|--------|
| Trunk swing            | 8.9          | 0.14              | 0-5    |
| Trunk curl             | 28.7         | 0.44              | 0-6    |
| Trunk curl-drop        | 8.0          | 0.10              | 0-4    |
| Trunk in mouth         | 2.9          | 0.03              | 0-2    |
| Ear flap               | 39.5         | 1.10              | 0-11   |
| Tail flick             | 37.6         | 1.39              | 0-22   |
| Object pick up         | 81.6         | -                 | -      |
| Object in mouth        | 16.6         | 0.18              | 0-3    |
| Throw/flick            | 17.4         | 0.24              | 0-5    |
| Stand on/kick          | 11.5         | 0.16              | 0-4    |
| Object test with trunk | 45.3         | 0.66              | 0-6    |
| Object test with foot  | 6.3          | 0.06              | 0-2    |
| Testing time           | -            | 11.06 s           | 1-57 s |
| Holding time           | -            | 5.54 s            | 0-37 s |

**Table S3.** The frequency of ethogram behaviours exhibited per video between object types. Values have been averaged between observers and standardised against video length. General behaviours (Table 1A) above the dotted line and object-directed behaviours (Table 1B) below.

| Behaviour              | Known  | Novel  |
|------------------------|--------|--------|
| Trunk swing            | 0.008  | 0.004  |
| Trunk curl             | 0.016  | 0.025  |
| Trunk curl-drop        | 0.005  | 0.005  |
| Trunk in mouth         | 0.008  | 0.004  |
| Ear flap               | 0.060  | 0.053  |
| Tail flick             | 0.070  | 0.066  |
| Object pick up         | 0.990* | 0.952* |
| Object in mouth        | 0.014  | 0.004  |
| Throw/flick            | 0.017  | 0.015  |
| Stand on/kick          | 0.004  | 0.011  |
| Object test with trunk | 0.025  | 0.042  |
| Object test with foot  | 0.004  | 0.002  |
| Testing time           | 0.422  | 0.639  |
| Holding time           | 0.446  | 0.268  |

\*Values indicate the observer-averaged probability of object pick up

**Table S4.** The presence, average and total range per video of ethogram behaviours per observer (for within-observer consistency testing). General behaviours (Table 1A) above the dotted line and object-directed behaviours (Table 1B) below.

| Behaviour              | Observer A   |                   |       | Observer B   |                   |       | Observer C   |                   |       |
|------------------------|--------------|-------------------|-------|--------------|-------------------|-------|--------------|-------------------|-------|
|                        | Presence (%) | Average per Video | Range | Presence (%) | Average per video | Range | Presence (%) | Average per Video | Range |
| Trunk swing            | 18.4         | 0.29              | 0–3   | 9.5          | 0.1               | 0–1   | 20           | 0.17              | 0–1   |
| Trunk curl             | 31.6         | 0.61              | 0–4   | 26.2         | 0.36              | 0–2   | 54.8         | 0.88              | 0–6   |
| Trunk curl-drop        | 23.7         | 0.24              | 0–1   | 0            | 0                 | 0     | 0            | 0                 | 0     |
| Trunk in mouth         | 7.9          | 0.08              | 0–1   | 0            | 0                 | 0     | 4.8          | 0.05              | 0–1   |
| Ear flap               | 50           | 1.08              | 0–6   | 28.6         | 0.95              | 0–7   | 38.1         | 1.48              | 0–10  |
| Tail flick             | 28.9         | 0.84              | 0–11  | 23.8         | 1.02              | 0–9   | 47.6         | 2.48              | 0–15  |
| Object pick up         | 68.4         | -                 | -     | 73.8         | -                 | -     | 90.5         | -                 | -     |
| Object in mouth        | 10.5         | 0.16              | 0–2   | 23.8         | 0.24              | 0–1   | 14.3         | 0.14              | 0–1   |
| Throw/flick            | 7.9          | 0.18              | 0–3   | 21.4         | 0.31              | 0–2   | 19           | 0.19              | 0–1   |
| Stand on/kick          | 18.4         | 0.29              | 0–2   | 0            | 0                 | 0     | 0            | 0                 | 0     |
| Object test with trunk | 28.9         | 0.42              | 0–4   | 23.8         | 0.26              | 0–2   | 69           | 1.36              | 0–6   |
| Object test with foot  | 0            | 0                 | 0     | 0            | 0                 | 0     | 9.5          | 0.1               | 0–1   |
| Testing time           | -            | 14.13             | 2–56  | -            | 9.74              | 1–46  | -            | 10.93             | 2–38  |
| Holding time           | -            | 5.66              | 0–21  | -            | 5.76              | 0–26  | -            | 6.26              | 0–13  |
